# Supplementary material for: The Etiologies of Chronic Progressive Cerebellar Ataxia in a Korean Population
Source: PubMed Central journal article supplement — J Clin Neurol. 2018 Jun 29;14(3):374–80. doi: 10.3988/jcn.2018.14.3.374 (PMC6032000; doi:10.3988/jcn.2018.14.3.374), 2018-06-29
Supplement: jcn-14-374-s001.pdf [file jcn-14-374-s001.pdf]

**Supplementary Table 1.** Demographic characteristics of patients with Friedreich ataxia screening test

| <b>Character</b>            | <b>Value</b> |
|-----------------------------|--------------|
| Patients ( <i>n</i> )       | 66           |
| Positive family history (%) | 20 (30.3%)   |
| Gender (male:female)        | 35:31        |
| Age at onset (years)        | 28.41±1.55   |
| Disease duration (years)    | 10.12±1.21   |
